# Supplementary material for: Vitamin D Status and Reference Intervals Measured by Liquid Chromatography–Tandem Mass Spectrometry for the Early Adulthood to Geriatric Ages in a South Korean Population during 2017–2022
Source: MDPI journal article supplement (doi:10.3390/nu16050604), 2024-02-22
Supplement: s1 [file s1]

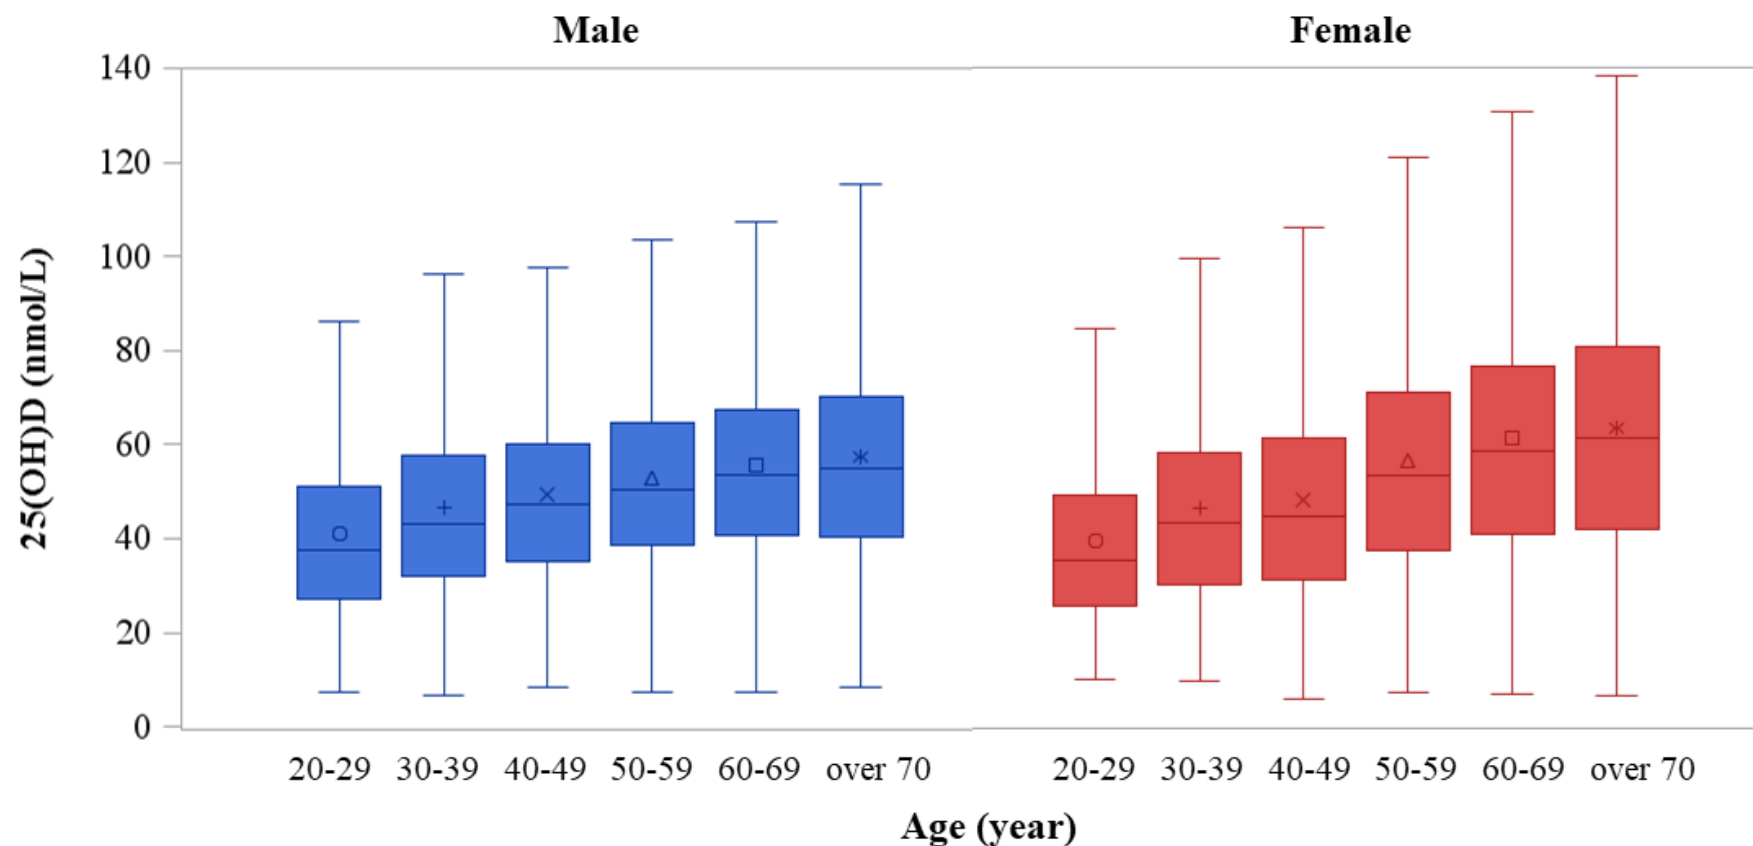

**Supplementary Figure S1.** Distributions of serum 25(OH)D concentrations by age and sex. The upper and lower whiskers indicate the 97.5<sup>th</sup> and 2.5<sup>th</sup> percentiles, respectively. For each sex, comparison of median values among age groups was performed using the Kruskal-Wallis test, and pairwise comparisons between adjacent age groups were performed using the Dwass-Steel-Critchlow-Fligner method ( $P < 0.05$ ). 25(OH)D, 25-hydroxyvitamin D

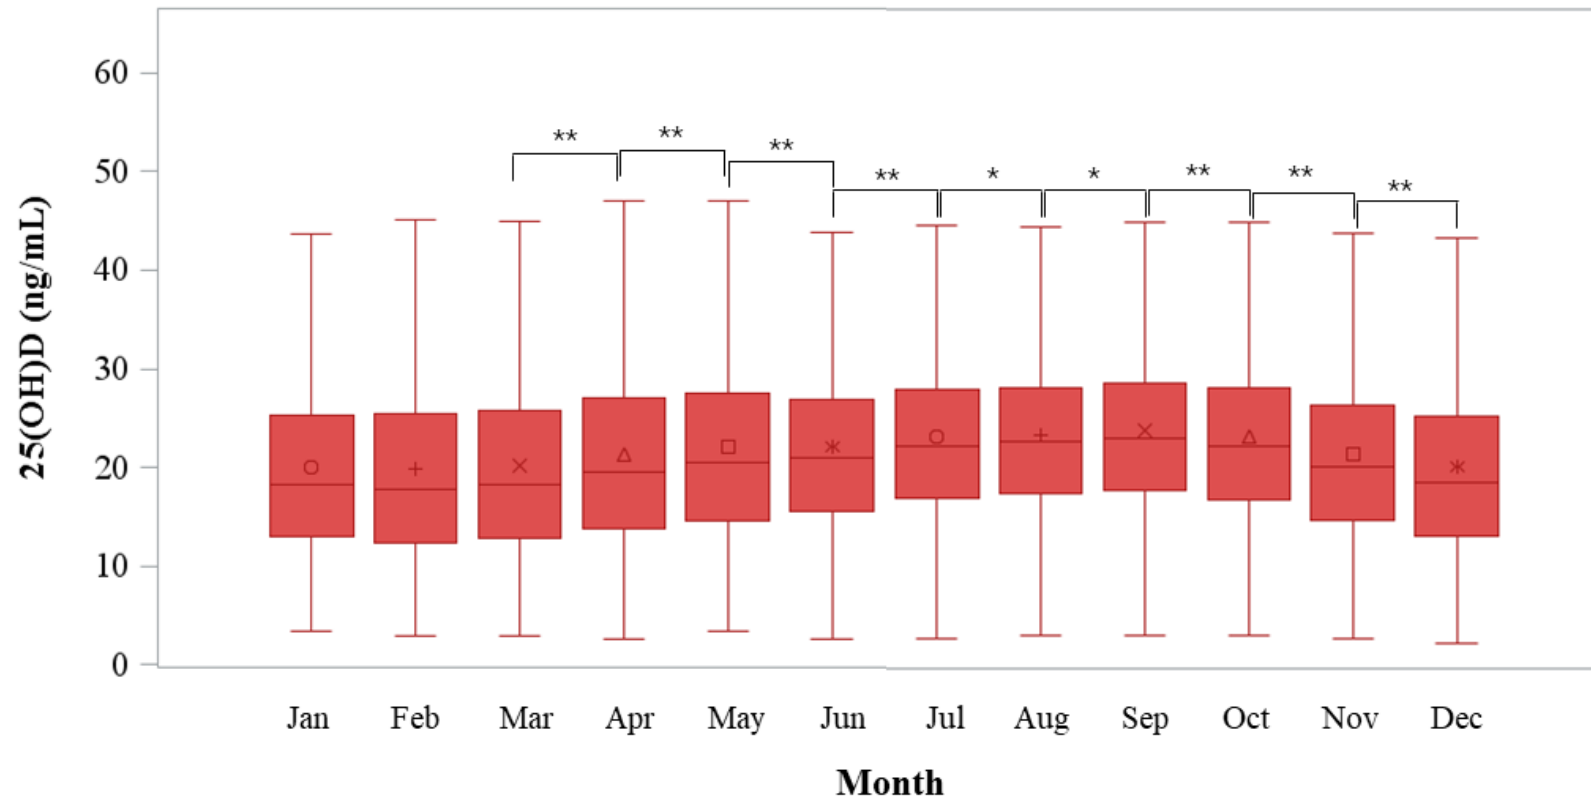

**Supplementary Figure S2.** Distributions of serum 25(OH)D concentrations by month of checkup. The upper and lower whiskers indicate the 97.5<sup>th</sup> and 2.5<sup>th</sup> percentiles, respectively. Comparison of median values among sampling month was performed using the Kruskal-Wallis test, and pairwise comparisons between adjacent months were performed using the Dwass-Steel-Critchlow-Fligner method (\* $P < 0.05$ , \*\* $P < 0.01$ ). 25(OH)D, 25-hydroxyvitamin D

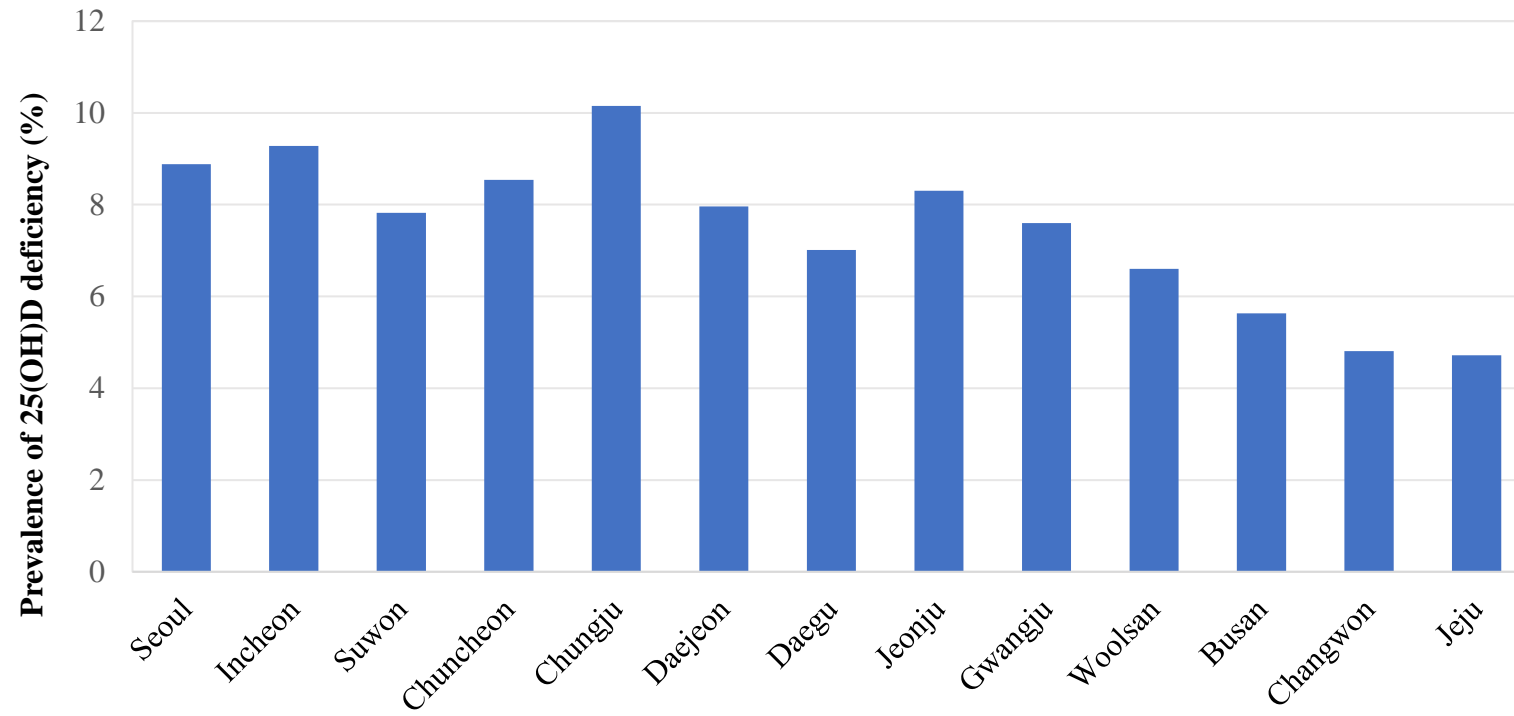

**Supplementary Figure S3.** Prevalence of serum 25(OH)D deficiency (<25 nmol/L) by city of residence. 25(OH)D, 25-hydroxyvitamin D

**Supplementary Table S1.** Detection rate of 25(OH)D<sub>2</sub> by sex and age

|         | 25(OH)D <sub>2</sub> detected |      |
|---------|-------------------------------|------|
|         | <i>N</i>                      | %    |
| Total   | 11,024                        | 9.2  |
| Sex     |                               |      |
| Male    | 4,681                         | 8.0  |
| Female  | 6,343                         | 10.3 |
| Age     |                               |      |
| 20-29   | 136                           | 6.8  |
| 30-39   | 704                           | 7.6  |
| 40-49   | 1,674                         | 7.5  |
| 50-59   | 3,375                         | 8.9  |
| 60-69   | 3,990                         | 10.6 |
| Over 70 | 1,145/                        | 11.1 |

25(OH)D, 25-hydroxyvitamin D
